# Supplementary material
Source: PubMed Central journal article supplement (PMC6240002)

Fig. S1.

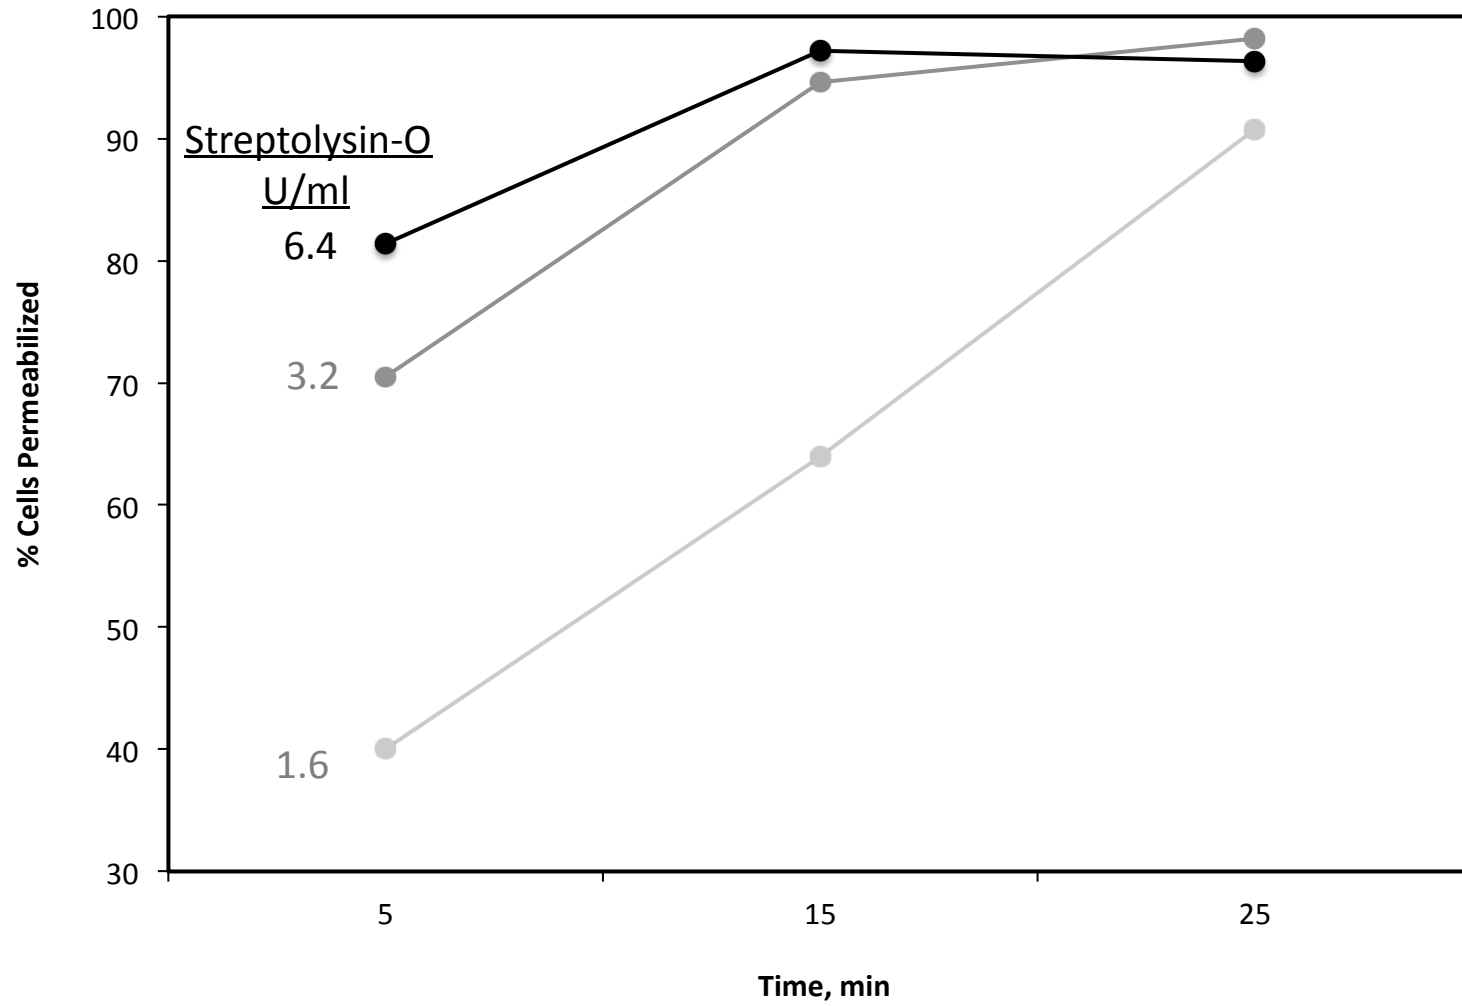

Supplement: NIHMS993574-supplement-2.pdf [file NIHMS993574-supplement-2.pdf]
